# Supplementary material
Source: Research Square preprint supplement (doi:10.21203/rs.3.rs-8928684/v1)
Supplement: Supplementary file 1 [file bbaf3e131b09a31a55d469ea.docx]

**Table supplementary**

**Table S1.** Changes resulting from cultural adaptation: summary of cognitive interviews (n=20), type of modification and final wording of items (24 items).

| Item | Domain | Summary (cognitive interviews) | Type of modification | Final item wording |
| --- | --- | --- | --- | --- |
| 1 | Psychosocial and emotional | Adequate comprehension; no relevant issues were identified during cognitive interviews. | The item was understood without ambiguity and did not require changes. | Felt stressed or lacked enough time to breastfeed |
| 2 | Psychosocial and emotional | Adequate comprehension; no relevant issues were identified during cognitive interviews. | No comprehension difficulties were observed; wording was retained. | Thought that her milk does not nourish her baby well |
| 3 | Psychosocial and emotional | Adequate comprehension; no relevant issues were identified during cognitive interviews. | Participants interpreted the item consistently; no changes were made. | Pressure from other people to stop breastfeeding |
| 4 | Psychosocial and emotional | Cultural/semantic ambiguity was identified; local examples were incorporated and double interpretation was avoided. | Potential double interpretation of ‘in public’ was detected; local contextualisation was added to anchor the scenario (eg, community, health post, travel time). | Embarrassment about breastfeeding in public (eg, community, travel time, health post). |
| 5 | Psychosocial and emotional | Adequate comprehension; no relevant issues were identified during cognitive interviews. | Adequate semantic and cultural clarity; no modifications were suggested. | Felt sad or depressed after delivery |
| 6 | Psychosocial and emotional | Adequate comprehension; no relevant issues were identified during cognitive interviews. | No confusing terms or double interpretation were identified; it was retained. | Fed her baby formula due to family suggestion/decision |
| 7 | Clinical and biological | Adequate comprehension; no relevant issues were identified during cognitive interviews. | The statement was considered relevant and understandable in the local context; no changes were made. | Cracked, painful or inflamed nipples |
| 8 | Clinical and biological | Adequate comprehension; no relevant issues were identified during cognitive interviews. | Uniform comprehension in cognitive interviews; no changes were required. | Flat or inverted nipples that make breastfeeding difficult |
| 9 | Clinical and biological | Adequate comprehension; no relevant issues were identified during cognitive interviews. | No interpretation problems were observed; the formulation was retained. | Baby refused the breast or fell asleep hungry after breastfeeding |
| 10 | Clinical and biological | Adequate comprehension; no relevant issues were identified during cognitive interviews. | Adequate semantic and cultural clarity; no modifications were suggested. | Used medication or had an illness that affected breastfeeding |
| 11 | Clinical and biological | Adequate comprehension; no relevant issues were identified during cognitive interviews. | The statement was considered relevant and understandable in the local context; no changes were made. | No skin-to-skin contact in the first hour |
| 12 | Clinical and biological | Adequate comprehension; no relevant issues were identified during cognitive interviews. | The item was understood without ambiguity and did not require changes. | Did not initiate breastfeeding within the first hour of life |
| 13 | Family and community support | Adequate comprehension; no relevant issues were identified during cognitive interviews. | Participants interpreted the item consistently; no changes were made. | Received help from partner/family to care for the baby |
| 14 | Family and community support | Adequate comprehension; no relevant issues were identified during cognitive interviews. | No interpretation problems were observed; the formulation was retained. | No one taught her how to position the baby correctly |
| 15 | Family and community support | Adequate comprehension; no relevant issues were identified during cognitive interviews. | Uniform comprehension in cognitive interviews; no changes were required. | Did not receive breastfeeding guidance at the health centre |
| 16 | Family and community support | Adequate comprehension; no relevant issues were identified during cognitive interviews. | Adequate semantic and cultural clarity; no modifications were suggested. | Has someone who encourages/motivates her to continue breastfeeding |
| 17 | Family and community support | Adequate comprehension; no relevant issues were identified during cognitive interviews. | Participants interpreted the item consistently; no changes were made. | Perceives that her family environment values breastfeeding |
| 18 | Accessibility and environment | Cultural/semantic ambiguity was identified; local examples were incorporated and double interpretation was avoided. | The concept of ‘difficulty/distance’ was specified by incorporating contextual references (community, health post, travel time) to standardise interpretation. | Difficulty reaching the health centre when she has doubts/problems (eg, community, travel time, health post). |
| 19 | Accessibility and environment | Cultural/semantic ambiguity was identified; local examples were incorporated and double interpretation was avoided. | The concept of ‘difficulty/distance’ was specified by incorporating contextual references (community, health post, travel time) to standardise interpretation. | The health centre where she can receive support is far away (eg, community, travel time, health post). |
| 20 | Accessibility and environment | Adequate comprehension; no relevant issues were identified during cognitive interviews. | The statement was considered relevant and understandable in the local context; no changes were made. | Understands the information she receives about breastfeeding |
| 21 | Accessibility and environment | Adequate comprehension; no relevant issues were identified during cognitive interviews. | Participants interpreted the item consistently; no changes were made. | Had previous breastfeeding experience |
| 22 | Prior experience and perceptions | Adequate comprehension; no relevant issues were identified during cognitive interviews. | The statement was considered relevant and understandable in the local context; no changes were made. | Feels that breastfeeding limits her daily activities |
| 23 | Prior experience and perceptions | Adequate comprehension; no relevant issues were identified during cognitive interviews. | The item was understood without ambiguity and did not require changes. | Thought that her baby is not satisfied with breast milk alone |
| 24 | Prior experience and perceptions | Adequate comprehension; no relevant issues were identified during cognitive interviews. | No interpretation problems were observed; the formulation was retained. | Considered stopping breastfeeding due to lack of confidence in herself |

Note: This table summarises changes derived from cognitive interviews (n=20) using think-aloud techniques and probing (comprehension, retrieval, judgement and response). Only semantic or cultural-contextual modifications were recorded, without altering the construct measured, and traceability (finding → type of adjustment → final wording) is documented. For items classified as ‘No changes’, the opening phrase was used as a standardised record indicating no issues with comprehension or cultural relevance; this does not imply homogeneous responses across participants.

**Table S2.** Item-level content validity: Aiken’s V per item (clarity, relevance and coherence) with expert panel recommendation (retain/revise) for the 24 items.

| Item (internal code) | Domain | Aiken’s V (clarity) | Aiken’s V (relevance) | Aiken’s V (coherence) | Expert panel recommendation |
| --- | --- | --- | --- | --- | --- |
| tsuf | Psychosocial and emotional | 0.70 | 0.90 | 0.80 | Revise |
| nalb | Psychosocial and emotional | 0.60 | 0.85 | 0.75 | Revise |
| vlpub | Psychosocial and emotional | 0.75 | 0.90 | 0.90 | Revise |
| nlpub | Psychosocial and emotional | 0.75 | 0.80 | 0.70 | Revise |
| tdpp | Psychosocial and emotional | 0.60 | 0.75 | 0.85 | Revise |
| apfa_item | Psychosocial and emotional | 0.85 | 0.85 | 0.70 | Revise |
| gdip | Clinical and biological | 0.85 | 0.80 | 0.85 | Retain |
| ppinv_item | Clinical and biological | 0.90 | 0.70 | 0.85 | Revise |
| brpch | Clinical and biological | 0.90 | 0.90 | 0.85 | Retain |
| umedl_item | Clinical and biological | 0.75 | 0.95 | 0.75 | Revise |
| cpph_item | Clinical and biological | 0.80 | 0.80 | 0.80 | Retain |
| clph_item | Clinical and biological | 0.75 | 0.85 | 0.75 | Revise |
| aypf | Family and community support | 0.85 | 0.85 | 0.85 | Retain |
| ecol_item | Family and community support | 0.70 | 0.65 | 0.75 | Revise |
| orcs_item | Family and community support | 0.90 | 0.70 | 0.80 | Revise |
| anml | Family and community support | 0.65 | 0.90 | 0.90 | Revise |
| efvl_item | Family and community support | 0.90 | 0.90 | 0.80 | Retain |
| difcs | Accessibility and environment | 0.70 | 0.75 | 0.55 | Revise |
| lcs | Accessibility and environment | 0.70 | 0.95 | 0.70 | Revise |
| cinf | Accessibility and environment | 0.65 | 0.85 | 0.85 | Revise |
| exneg | Accessibility and environment | 0.75 | 0.75 | 0.90 | Revise |
| llact | Prior experience and perceptions | 0.80 | 0.80 | 0.85 | Retain |
| nllm | Prior experience and perceptions | 0.70 | 0.90 | 0.85 | Revise |
| slcf | Prior experience and perceptions | 0.85 | 0.85 | 0.85 | Retain |

Note: Aiken’s V per item is reported for clarity, relevance and coherence (1–5 scale; five judges). The expert panel recommendation was defined a priori using the minimum V across criteria: Retain if min(V) >0.75 for all criteria; Revise if min(V) ≤0.75 in at least one criterion, or based on qualitative panel suggestions. Item codes (eg, tsuf, nalb) are internal instrument labels; for editorial reading, items can be referred to as Item 1–24 according to the application order.

**Table S3.** Item descriptives and performance: response distributions, missing values and floor/ceiling effects.

| Item | Domain | Type | Response distribution, n (%) | Missing values, n (%) | Floor (%) | Ceiling (%) |
| --- | --- | --- | --- | --- | --- | --- |
| tsuf | Psychosocial and emotional | Likert (3-point) | Never: 143 (59.6%); Sometimes: 55 (22.9%); Always: 42 (17.5%) | 0 (0.0%) | 59.6 | 17.5 |
| nalb | Psychosocial and emotional | Likert (3-point) | Never: 137 (57.1%); Sometimes: 79 (32.9%); Always: 24 (10.0%) | 0 (0.0%) | 57.1 | 10.0 |
| vlpub | Psychosocial and emotional | Likert (3-point) | Never: 151 (62.9%); Sometimes: 64 (26.7%); Always: 25 (10.4%) | 0 (0.0%) | 62.9 | 10.4 |
| nlpub | Psychosocial and emotional | Likert (3-point) | Never: 129 (53.8%); Sometimes: 84 (35.0%); Always: 27 (11.2%) | 0 (0.0%) | 53.8 | 11.2 |
| tdpp | Psychosocial and emotional | Likert (3-point) | Never: 69 (28.7%); Sometimes: 160 (66.7%); Always: 11 (4.6%) | 0 (0.0%) | 28.7 | 4.6 |
| apfa_item | Psychosocial and emotional | Dichotomous | No: 171 (71.2%); Sí: 69 (28.7%) | 0 (0.0%) | 71.2 | 28.7 |
| gdip | Clinical and biological | Dichotomous | No: 132 (55.0%); Sí: 108 (45.0%) | 0 (0.0%) | 55.0 | 45.0 |
| ppinv_item | Clinical and biological | Dichotomous | No: 184 (76.7%); Sí: 56 (23.3%) | 0 (0.0%) | 76.7 | 23.3 |
| brpch | Clinical and biological | Likert (3-point) | Never: 57 (23.8%); Sometimes: 163 (67.9%); Always: 20 (8.3%) | 0 (0.0%) | 23.8 | 8.3 |
| umedl_item | Clinical and biological | Dichotomous | No: 209 (87.1%); Sí: 31 (12.9%) | 0 (0.0%) | 87.1 | 12.9 |
| cpph_item | Clinical and biological | Dichotomous | No: 166 (69.2%); Sí: 74 (30.8%) | 0 (0.0%) | 69.2 | 30.8 |
| clph_item | Clinical and biological | Dichotomous | No: 153 (63.7%); Sí: 87 (36.2%) | 0 (0.0%) | 63.7 | 36.2 |
| aypf | Family and community support | Likert (3-point) | Never: 32 (13.3%); Sometimes: 24 (10.0%); Always: 184 (76.7%) | 0 (0.0%) | 13.3 | 76.7 |
| ecol_item | Family and community support | Dichotomous | No: 38 (15.8%); Sí: 202 (84.2%) | 0 (0.0%) | 15.8 | 84.2 |
| orcs_item | Family and community support | Dichotomous | No: 42 (17.5%); Sí: 198 (82.5%) | 0 (0.0%) | 17.5 | 82.5 |
| anml | Family and community support | Likert (3-point) | Never: 40 (16.7%); Sometimes: 71 (29.6%); Always: 129 (53.8%) | 0 (0.0%) | 16.7 | 53.8 |
| efvl_item | Family and community support | Dichotomous | No: 39 (16.2%); Sí: 201 (83.8%) | 0 (0.0%) | 16.2 | 83.8 |
| difcs | Accessibility and environment | 3 categorías (distancia) | Near: 209 (87.1%); Moderate: 20 (8.3%); Far: 11 (4.6%) | 0 (0.0%) | 87.1 | 4.6 |
| lcs | Accessibility and environment | 3 categorías (distancia) | Near: 212 (88.3%); Moderate: 15 (6.2%); Far: 13 (5.4%) | 0 (0.0%) | 88.3 | 5.4 |
| cinf | Accessibility and environment | 3 categorías (comprensión) | Easy: 202 (84.2%); Fair: 30 (12.5%); Difficult: 8 (3.3%) | 0 (0.0%) | 84.2 | 3.3 |
| exneg | Accessibility and environment | 3 categorías (experiencia) | Good: 181 (75.4%); Fair: 46 (19.2%); Poor: 13 (5.4%) | 0 (0.0%) | 75.4 | 5.4 |
| llact | Prior experience and perceptions | Likert (3-point) | Never: 68 (28.3%); Sometimes: 115 (47.9%); Always: 57 (23.8%) | 0 (0.0%) | 28.3 | 23.8 |
| nllm | Prior experience and perceptions | Likert (3-point) | Never: 88 (36.7%); Sometimes: 147 (61.3%); Always: 5 (2.1%) | 0 (0.0%) | 36.7 | 2.1 |
| slcf | Prior experience and perceptions | Likert (3-point) | Never: 199 (82.9%); Sometimes: 31 (12.9%); Always: 10 (4.2%) | 0 (0.0%) | 82.9 | 4.2 |

Note: Frequencies by response category and item-level descriptive metrics are presented (floor and ceiling as percentages in extreme categories). Missing values were 0 because the instrument was administered using a structured form with mandatory fields and completeness verification at the time of interview; consistency rules and data checks were also applied before database lock.

**Table S4.** Full exploratory factor analysis (EFA): extraction/rotation method, factor loadings, communalities and explained variance.

| Item | **F1** | **F2** | **F3** | **F4** | **F5** | **h2** |
| --- | --- | --- | --- | --- | --- | --- |
| tsuf | 0.55 | — | — | — | 0.37 | 0.52 |
| nalb | 0.73 | — | — | — | — | 0.60 |
| vlpub | 0.68 | — | — | — | — | 0.57 |
| nlpub | 0.70 | — | — | — | — | 0.63 |
| tdpp | 0.58 | — | — | — | — | 0.44 |
| apfa_item | 0.74 | — | — | — | — | 0.58 |
| gdip | — | — | 0.71 | — | — | 0.61 |
| ppinv_item | — | — | 0.61 | — | — | 0.47 |
| brpch | — | — | 0.66 | — | — | 0.55 |
| umedl_item | — | — | 0.56 | — | — | 0.40 |
| cpph_item | 0.36 | — | 0.49 | — | — | 0.45 |
| clph_item | 0.37 | — | 0.52 | — | — | 0.48 |
| aypf | — | 0.82 | — | — | — | 0.68 |
| ecol_item | — | 0.70 | — | — | — | 0.54 |
| orcs_item | — | 0.54 | — | — | — | 0.40 |
| anml | — | 0.66 | — | — | — | 0.53 |
| efvl_item | — | 0.74 | — | — | — | 0.59 |
| difcs | — | — | — | 0.70 | — | 0.54 |
| lcs | — | — | — | 0.70 | — | 0.57 |
| cinf | — | — | — | 0.75 | — | 0.63 |
| exneg | — | — | — | 0.67 | — | 0.53 |
| llact | — | — | — | — | 0.66 | 0.60 |
| nllm | — | — | — | — | 0.70 | 0.59 |
| slcf | — | — | — | 0.34 | 0.65 | 0.58 |

| Factor | **SS loadings** | **% variance** | **Cumulative %** |
| --- | --- | --- | --- |
| F1 | 3.40 | 14.17 | 14.17 |
| F2 | 2.75 | 11.46 | 25.63 |
| F3 | 2.50 | 10.41 | 36.04 |
| F4 | 2.52 | 10.50 | 46.54 |
| F5 | 1.92 | 8.00 | 54.54 |

Note: Rotated factor loadings and communalities (h²) from the EFA are shown. For ease of interpretation, loadings <0.30 were suppressed and are shown as “—”; therefore, “—” does not indicate an exactly zero loading, but an effect below the reporting threshold. Explained variance is reported by factor and cumulatively.

**Table S5.** Full confirmatory factor analysis (CFA): standardised item loadings, error variances and correlations between factors (five Domains).

| Item | Factor | **λ** | **θ** |
| --- | --- | --- | --- |
| tsuf | Psychosocial | 0.80 | 0.36 |
| nalb | Psychosocial | 0.76 | 0.43 |
| vlpub | Psychosocial | 0.78 | 0.40 |
| nlpub | Psychosocial | 0.86 | 0.27 |
| tdpp | Psychosocial | 0.75 | 0.43 |
| apfa_item | Psychosocial | 0.75 | 0.43 |
| gdip | Clinical and biological | 0.72 | 0.49 |
| ppinv_item | Clinical and biological | 0.69 | 0.53 |
| brpch | Clinical and biological | 0.75 | 0.44 |
| umedl_item | Clinical and biological | 0.78 | 0.39 |
| cpph_item | Clinical and biological | 0.82 | 0.33 |
| clph_item | Clinical and biological | 0.76 | 0.42 |
| aypf | Family/community support | 0.72 | 0.48 |
| ecol_item | Family/community support | 0.84 | 0.30 |
| orcs_item | Family/community support | 0.82 | 0.33 |
| anml | Family/community support | 0.75 | 0.43 |
| efvl_item | Family/community support | 0.88 | 0.22 |
| difcs | Accessibility and environment | 0.77 | 0.41 |
| lcs | Accessibility and environment | 0.79 | 0.37 |
| cinf | Accessibility and environment | 0.88 | 0.23 |
| exneg | Accessibility and environment | 0.75 | 0.44 |
| llact | Prior experience/perceptions | 0.80 | 0.36 |
| nllm | Prior experience/perceptions | 0.80 | 0.36 |
| slcf | Prior experience/perceptions | 0.72 | 0.47 |

| **Factor 1** | **Factor 2** | **r** |
| --- | --- | --- |
| Psychosocial | Clinical and biological | 0.713 |
| Psychosocial | Family/community support | 0.669 |
| Psychosocial | Accessibility and environment | 0.631 |
| Psychosocial | Prior experience/perceptions | 0.672 |
| Clinical and biological | Family/community support | 0.578 |
| Clinical and biological | Accessibility and environment | 0.678 |
| Clinical and biological | Prior experience/perceptions | 0.582 |
| Family/community support | Accessibility and environment | 0.612 |
| Family/community support | Prior experience/perceptions | 0.525 |
| Accessibility and environment | Prior experience/perceptions | 0.642 |

Note: Standardised loadings (λ), error variances (θ) and interfactor correlations from the CFA are reported. The model was estimated using WLSMV/DWLS appropriate for ordinal indicators. Item codes are internal labels; mapping to the final item wording is provided in online supplemental table S1.
